# Supplementary material for: Inaugurating High‐Throughput Profiling of Extracellular Vesicles for Earlier Ovarian Cancer Detection
Source: PubMed Central journal article supplement (PMC10520636; doi:10.1002/advs.202301930), 2023-07-23
Supplement: ADVS-10-2301930-s001.pdf [file ADVS-10-2301930-s001.pdf]

## Supporting Information

for *Adv. Sci.*, DOI 10.1002/adv.202301930

Inaugurating High-Throughput Profiling of Extracellular Vesicles for Earlier Ovarian Cancer Detection

*Ala Jo, Allen Green, Jamie E. Medina, Sonia Iyer, Anders W. Ohman, Eric T. McCarthy, Ferenc Reinhardt, Thomas Gerton, Daniel Demehin, Ranjan Mishra, David L. Kolin, Hui Zheng, Jinwoo Cheon, Christopher P. Crum, Robert A. Weinberg, Bo R. Rueda, Cesar M. Castro\*, Daniela M. Dinulescu\* and Hakho Lee\**

## SUPPLEMENTARY INFORMATION

### Inaugurating high-throughput profiling of extracellular vesicles for earlier ovarian cancer detection

Ala Jo<sup>1,2,3</sup>, Allen Green<sup>4</sup>, Jamie E. Medina<sup>4#</sup>, Sonia Iyer<sup>5#</sup>, Anders W. Ohman<sup>4#</sup>, Eric T. McCarthy<sup>4#</sup>, Ferenc Reinhardt<sup>5</sup>, Thomas Gerton<sup>4</sup>, Daniel Demehin<sup>4</sup>, Ranjan Mishra<sup>5</sup>, David L. Kolin<sup>4</sup>, Hui Zheng<sup>6</sup>, Jinwoo Cheon<sup>3</sup>, Christopher P. Crum<sup>4</sup>, Robert A. Weinberg<sup>5</sup>, Bo R. Rueda<sup>7</sup>, Cesar M. Castro<sup>1,8\*</sup>, Daniela M. Dinulescu<sup>4\*</sup>, Hakho Lee<sup>1,2,3\*</sup>

<sup>1</sup> Center for Systems Biology, Massachusetts General Hospital, Harvard Medical School, Boston, MA 02114, USA

<sup>2</sup> Department of Radiology, Massachusetts General Hospital, Harvard Medical School, Boston, MA 02114, USA

<sup>3</sup> Center for Nanomedicine, Institute for Basic Science, Seoul, 03722, Republic of Korea

<sup>4</sup> Division of Women's and Perinatal Pathology, Department of Pathology, Brigham and Women's Hospital, Harvard Medical School, Boston, MA, 02115, USA

<sup>5</sup> Whitehead Institute, Massachusetts Institute of Technology, Cambridge, MA, 02142, USA

<sup>6</sup> Biostatistics Center, Massachusetts General Hospital, Boston, MA 02114, USA

<sup>7</sup> Division of Gynecologic Oncology, Department of Obstetrics and Gynecology, Massachusetts General Hospital, Boston, MA, 02114, USA

<sup>8</sup> Cancer Center, Massachusetts General Hospital, Harvard Medical School, Boston, MA, 02114, USA

#Equal contribution (J.E.M., S.I., A.W.O., E.T.M.)

\*Equal contribution, Co-Corresponding Authors (C.M.C., D.M.D., H.L.)

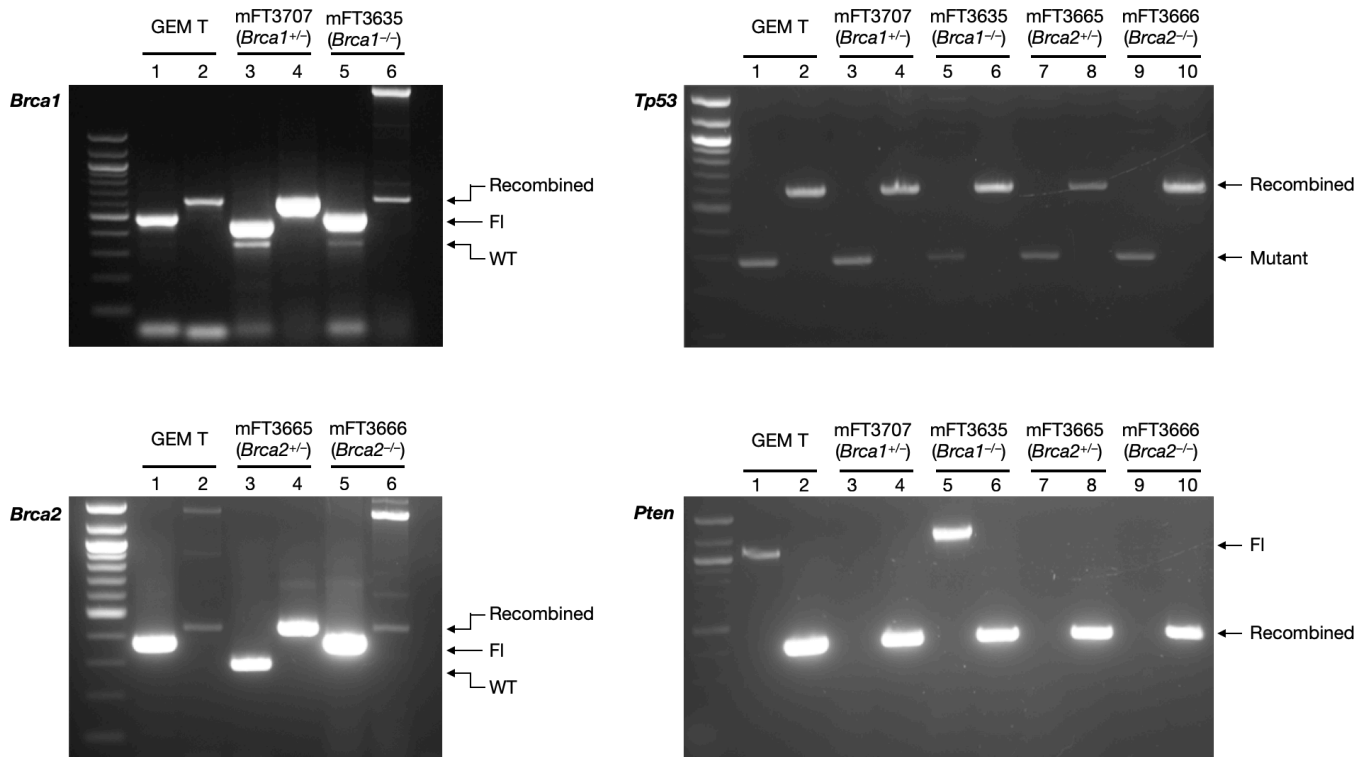

**Supplementary Figure S1. Genotyping of mFT cell lines.** *Brca1*, *Brca2*, *Tp53*, and *Pten* genes were amplified by a polymerase chain reaction and measured by gel electrophoresis. The following cell lines were characterized: mFT3707 (*Brca1*<sup>+/-</sup>, *Tp53*<sup>mut</sup>, *Pten*<sup>-/-</sup>), mFT3635 (*Brca1*<sup>-/-</sup>, *Tp53*<sup>mut</sup>, *Pten*<sup>-/-</sup>), mFT3665 (*Brca2*<sup>+/-</sup>, *Tp53*<sup>mut</sup>, *Pten*<sup>-/-</sup>) and mFT3666 (*Brca2*<sup>-/-</sup>, *Tp53*<sup>mut</sup>, *Pten*<sup>-/-</sup>). Odd numbered lanes have unrecombined DNA, and even numbered lanes have *Cre*-mediated recombined DNA. GEM T, tumors from genetically engineered model tumors; FI, floxed allele; WT, wild-type allele.

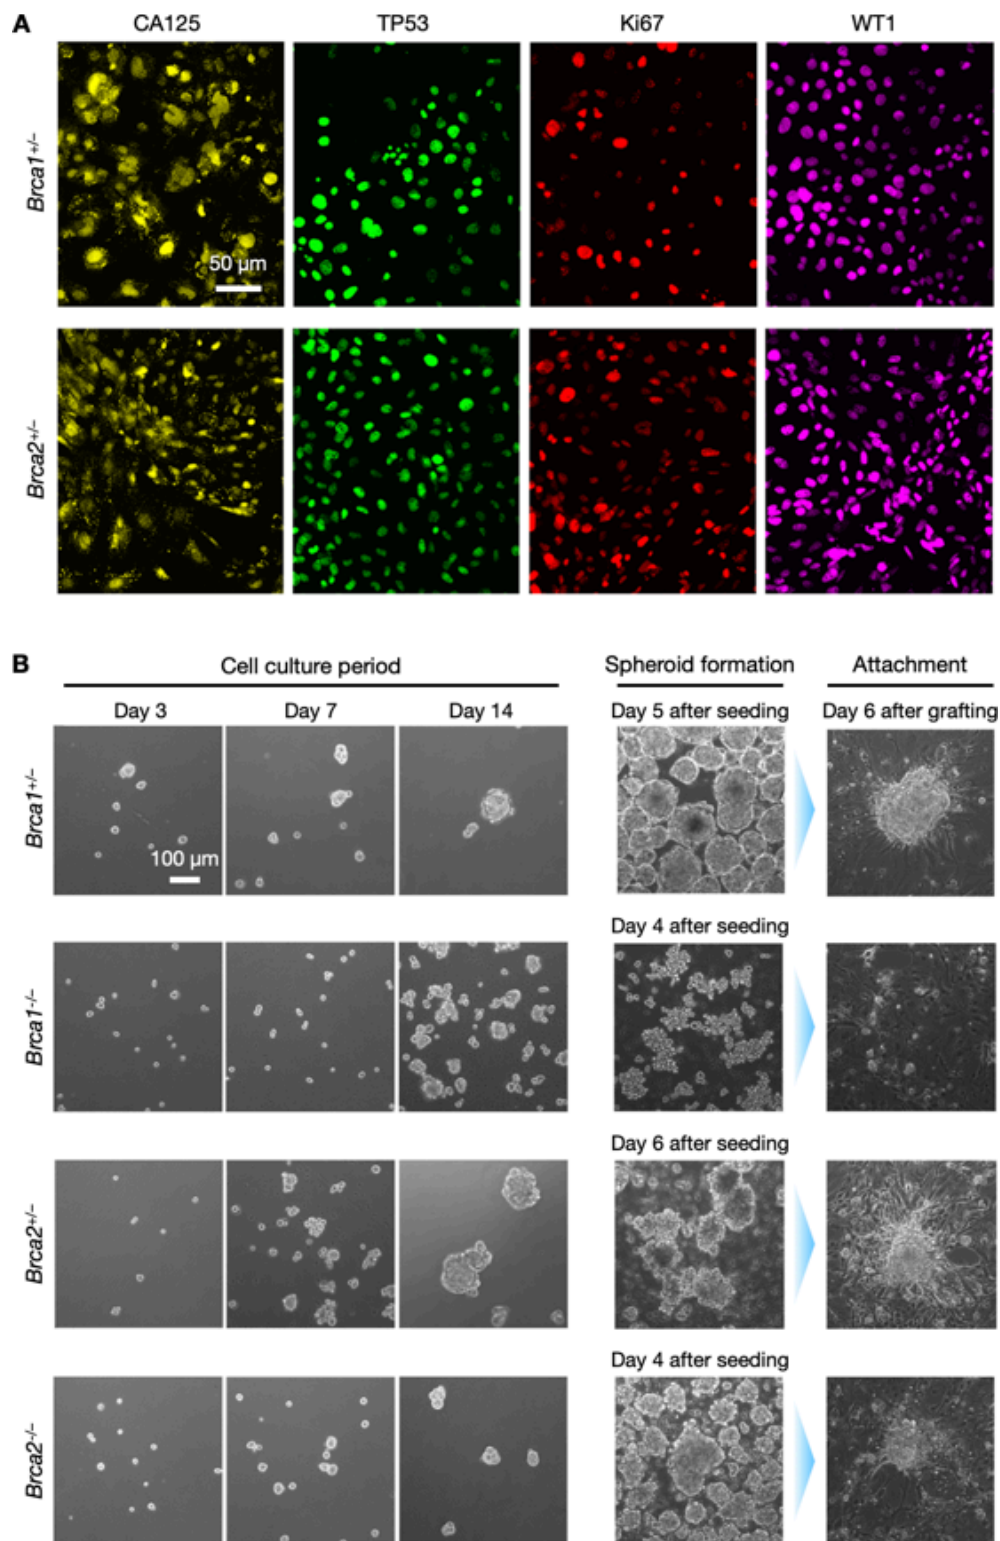

**Supplementary Figure S2. *In vitro* Characterization of mFT cell lines. (A)** Immunofluorescence staining of CA125, TP53, Ki67, and WT1 in additional mFT cell lines: mFT3707 (*Brca1<sup>+/-</sup>*) and mFT3665 (*Brca2<sup>+/-</sup>*). **(B)** Spheroid formation of mFT cell lines. Microscope images show spheroid formation and growth over a 14-day period. Spheroids were then transferred from ultra-low adhesion plates to attachment plates to demonstrate spheroids' capability to adhere to surfaces.

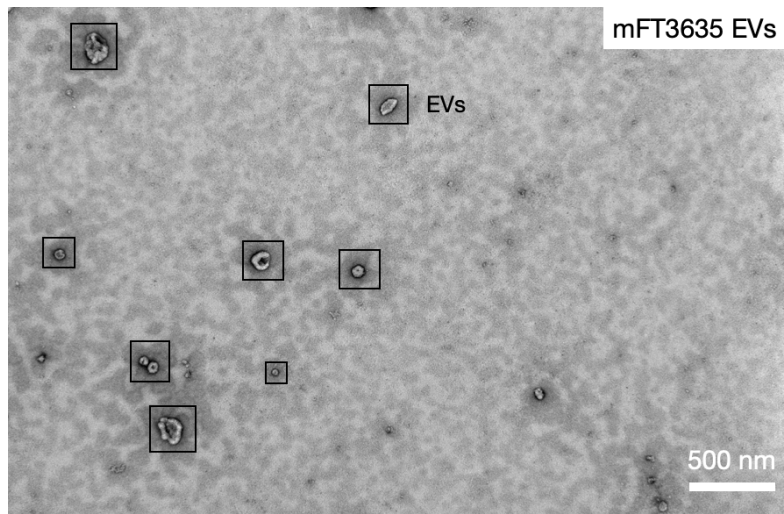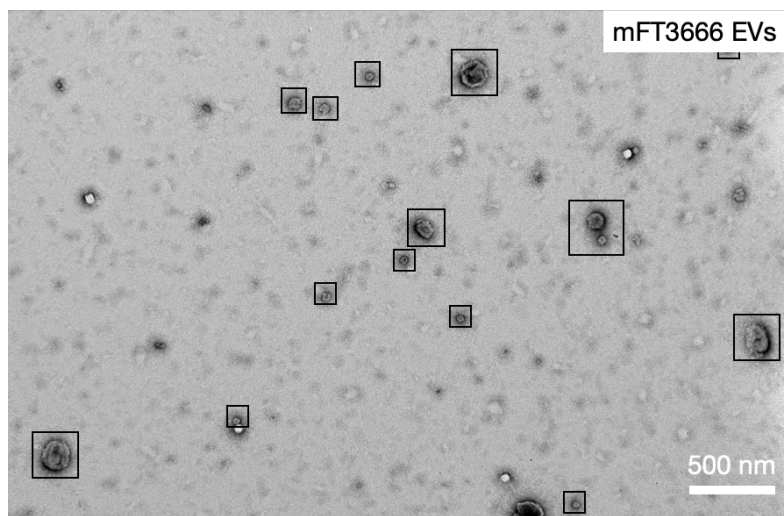

**Supplementary Figure S3. Large field-of-view TEM images of mFT EVs.** (Top) EVs isolated from mFT3635 cells. (Bottom) EVs isolated from mFT3666 cells. Black squares indicate EVs.

**A**

| Cell line                                  | EV sample replicate | Input [EV] (particles/mL) | Number of proteins identified | Total number of unique proteins |
|--------------------------------------------|---------------------|---------------------------|-------------------------------|---------------------------------|
| mFT3635<br>( <i>Brca1</i> <sup>-/-</sup> ) | 1                   | $2.5 \times 10^{11}$      | 571                           | $N_{3635} = 631$                |
|                                            | 2                   | $9.1 \times 10^{10}$      | 507                           |                                 |
|                                            | 3                   | $1.7 \times 10^{10}$      | 465                           |                                 |
| mFT3666<br>( <i>Brca2</i> <sup>-/-</sup> ) | 1                   | $1.4 \times 10^9$         | 133                           | $N_{3666} = 215$                |
|                                            | 2                   | $6.3 \times 10^9$         | 177                           |                                 |
|                                            | 3                   | $4.0 \times 10^8$         | 157                           |                                 |

**B**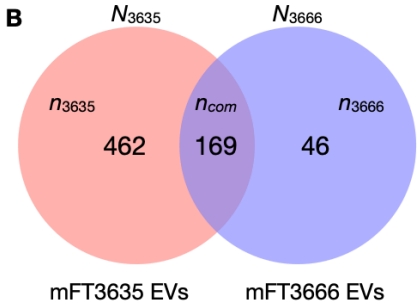

**Supplementary Figure S4. Proteome analysis of mFT EVs. (A)** Summary characteristics of mFT-EV samples isolated from mFT3635 and mFT3666 cell lines. Three replicates from each cell line were used for the proteome profiling. The input EV amount was larger for mFT3635 than for mFT3666, likely leading to more proteins identified in mFT3635 EV samples. **(B)** The Venn diagram shows the distribution of proteins identified in mFT3635- and mFT3666-EV samples.  $n_{3635}$  ( $n_{3666}$ ) is the number of proteins unique to mFT3635 (mFT3666) EVs, and  $n_{com}$  is the number of proteins common to both EV types. The observed  $n_{3635}/n_{3666} = 462/42 \approx 10$  is attributed to the imbalance in the total proteins detected. Specifically, the total number of proteins is written as  $N_{3635} = n_{3635} + n_{com}$  and  $N_{3666} = n_{3666} + n_{com}$ . From the mFT3635-EV data,  $n_{com}/N_{3635} = 169/631 = 0.27$ , which leads to  $n_{3635} = 2.7 \cdot n_{com}$  or equivalently  $N_{3635} = 3.7 \cdot n_{com}$ . Based on the total protein ratio ( $N_{3635}/N_{3666} = 2.9$ ),  $N_{3635} = 3.7 \cdot n_{com} = 2.9 \cdot n_{3666} + 2.9 \cdot n_{com}$ , which gives  $n_{3635} = 0.27 \cdot n_{com}$ . Thus, the expected  $n_{3635}/n_{3666}$  is 10, which matches the observed value.

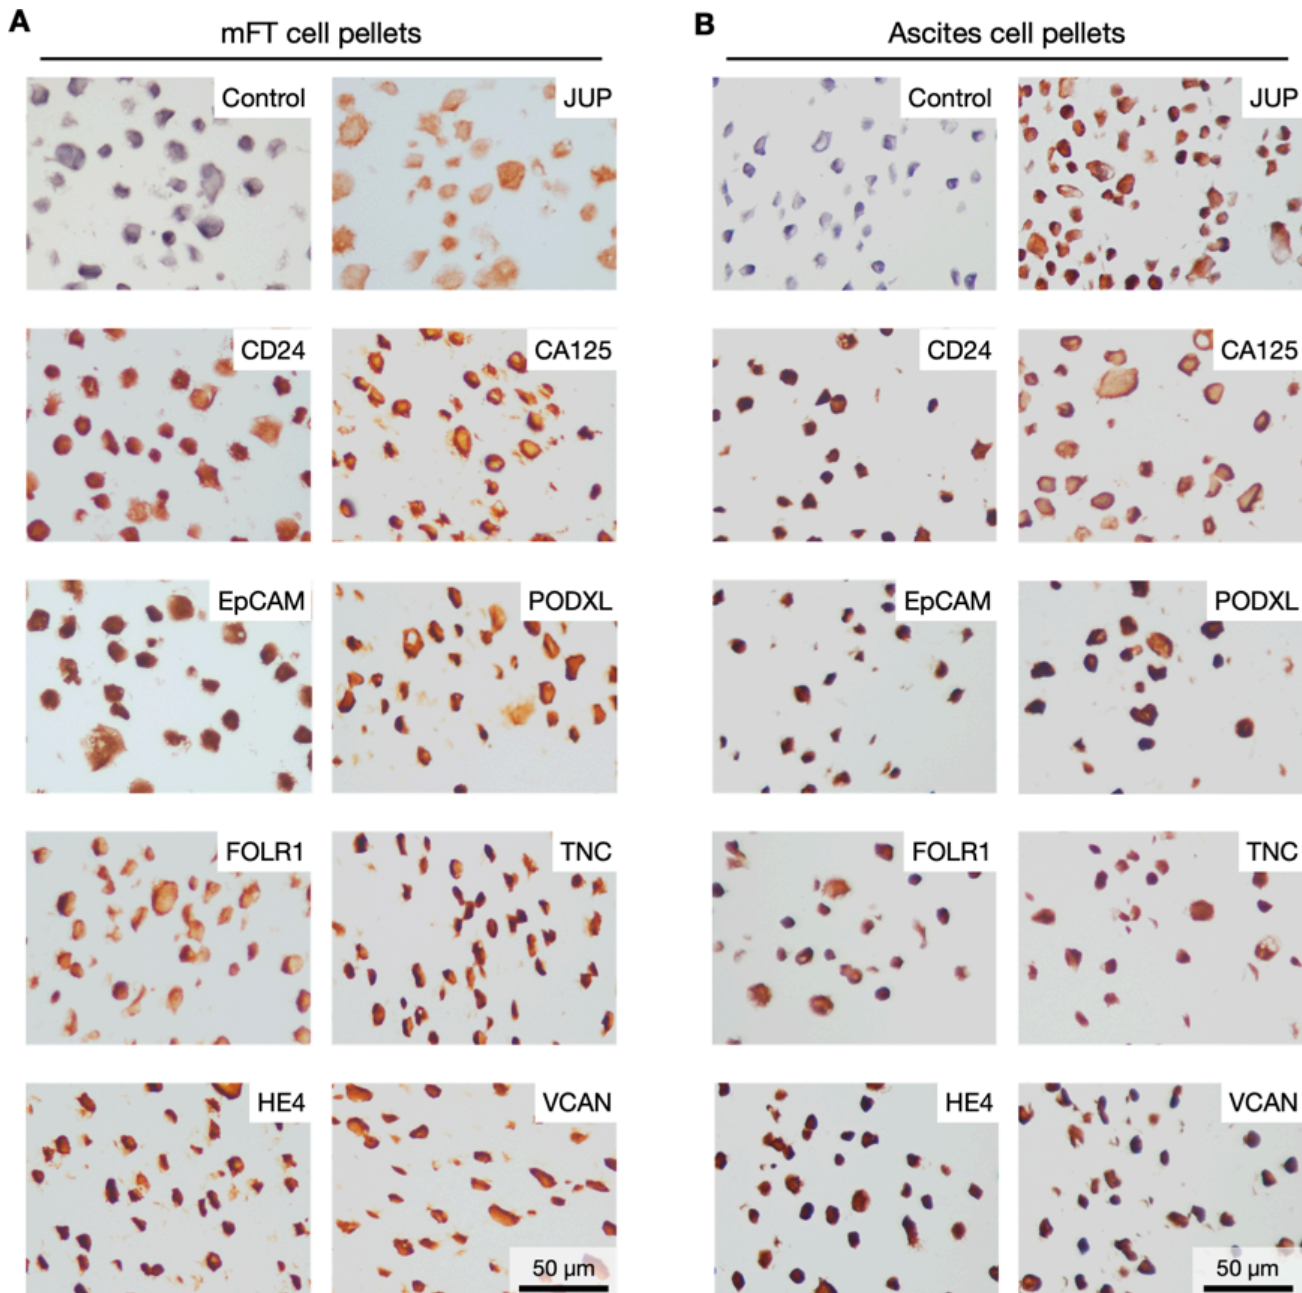

**Supplementary Figure S5. Expression of candidate markers in mFT parent and ascites cells. (A)** IHC staining of mFT3666 parental cell lines. **(B)** IHC staining of ascites cells collected from a mouse implanted with mFT3666 cells.



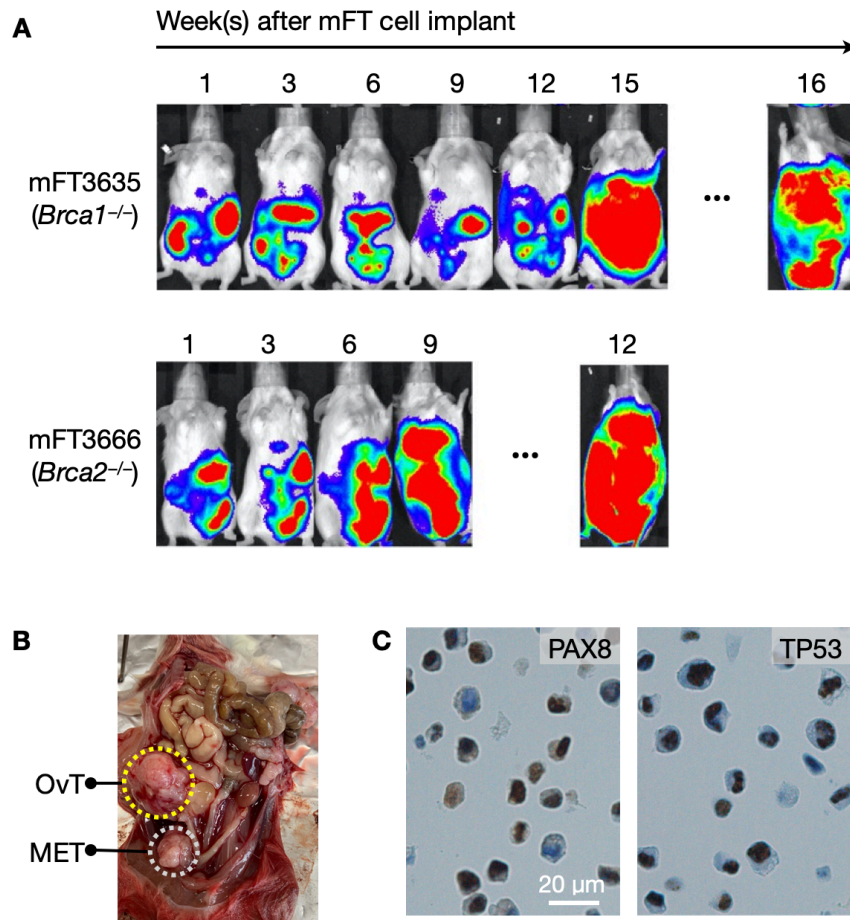

**Supplementary Figure S6. Tumorigenic properties of oncogenic mFT cell lines. (A)** NOD SCID mice were intraperitoneally implanted with oncogenic mFT cells expressing luciferase. Bioluminescence imaging confirmed the spread of the tumor throughout the peritoneum. **(B)** Presence of tumors in an NSG mouse orthotopically implanted with mFT3666 cells. OvT, primary tumor; MET, metastasis. **(C)** Representative images of ascites cells from mFT3666 engrafted mice. Cells were stained positive for PAX8 and TP53.



Day 0 (no tumor)

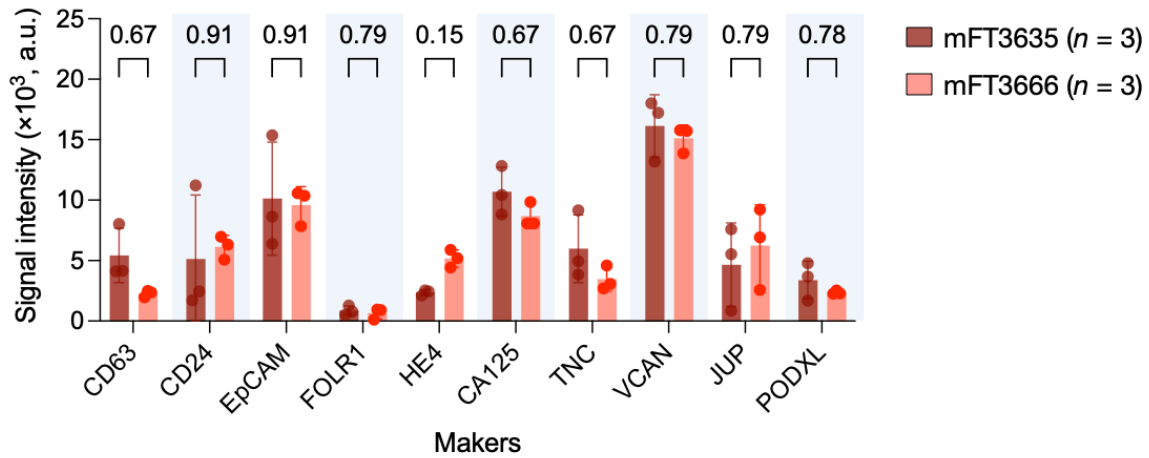

Day 30

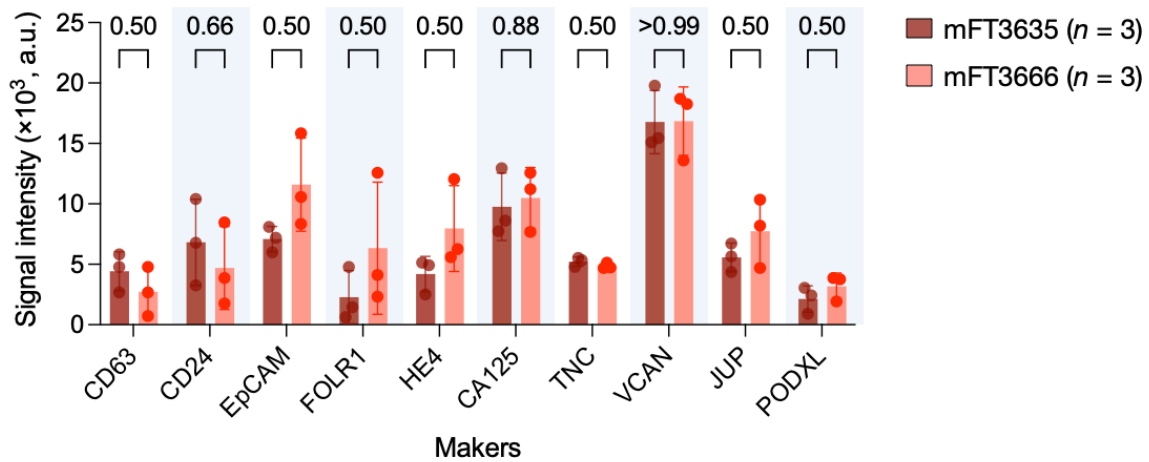

**Supplementary Figure S7. Comparison of EV markers between two mouse cohorts.** The first cohort ( $n = 3$ ) was implanted with mFT3635 cells, and the other ( $n = 3$ ) with mFT3666 cells. Plasma samples were serially collected before the mFT cell implant (day 0; top) and during tumor growth (day 30; bottom). Circulating EVs were analyzed for a tetraspanin (CD63) and the nine HGSOE markers. No significant differences were observed in marker expression between the two cohorts. Data are displayed as mean  $\pm$  s.d. Multiple comparison  $t$ -tests (unpaired, two-sided) were performed with the false discovery rate set  $<5\%$ . The  $q$  value is shown for each marker.

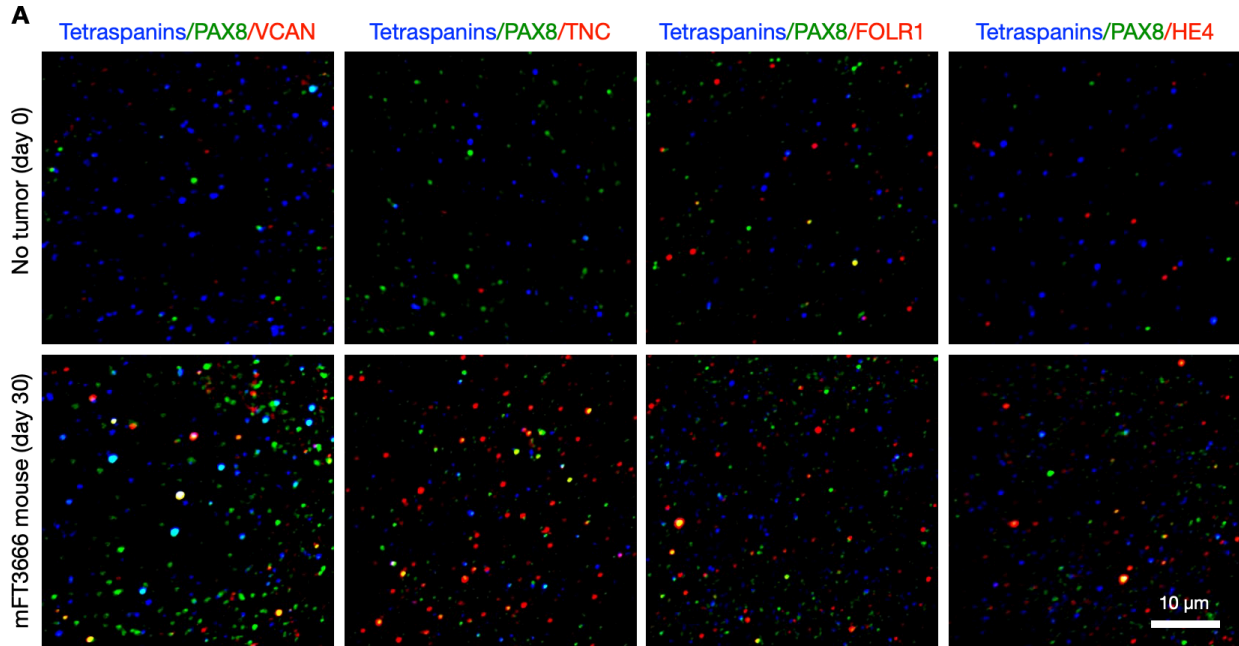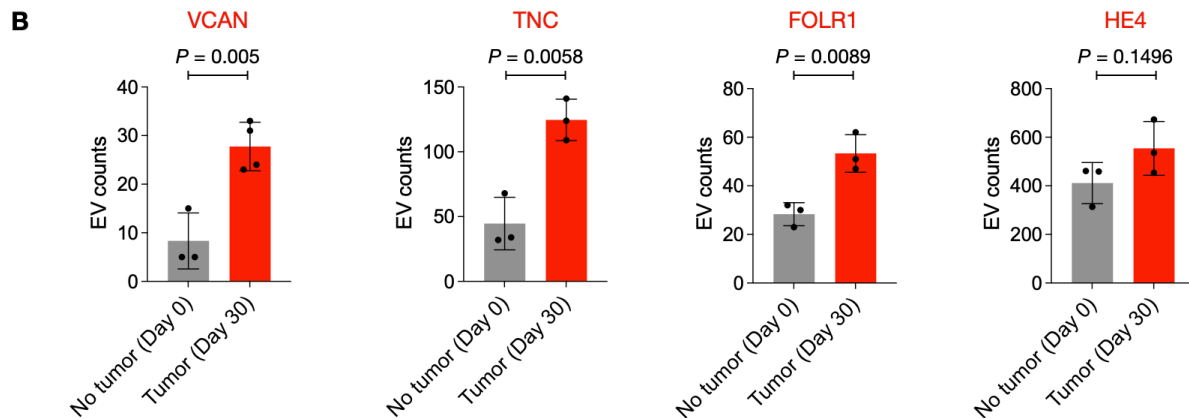

**Supplementary Figure S8. Single EV analysis of murine plasma EVs. (A)** Plasma samples were obtained from an animal before the mFT cell (*Brca2*<sup>-/-</sup>) implant (day 0) and during tumor growth (day 30). EVs were immunostained for tetraspanins (CD63, CD9, CD81), PAX8 (FT epithelial marker), and HGSOc markers. **(B)** More plasma EVs were counted positive for HGSOc markers in the day-30 sample. Each dot in the graph represents the marker-positive EV number in a given field of view.

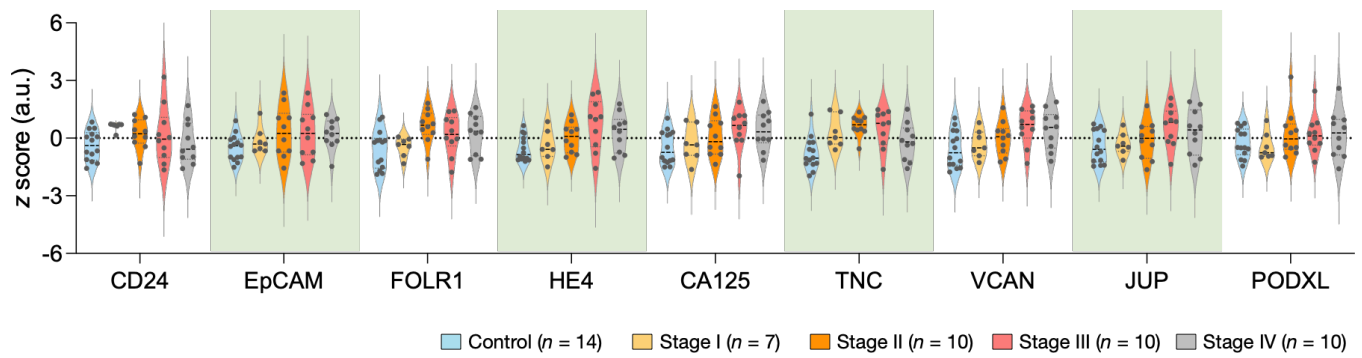

**Supplementary Figure S9. Expression levels of nine HGSOc markers.** EVs in clinical samples were profiled. For each marker, z-scores were calculated and stratified by the tumor stage.

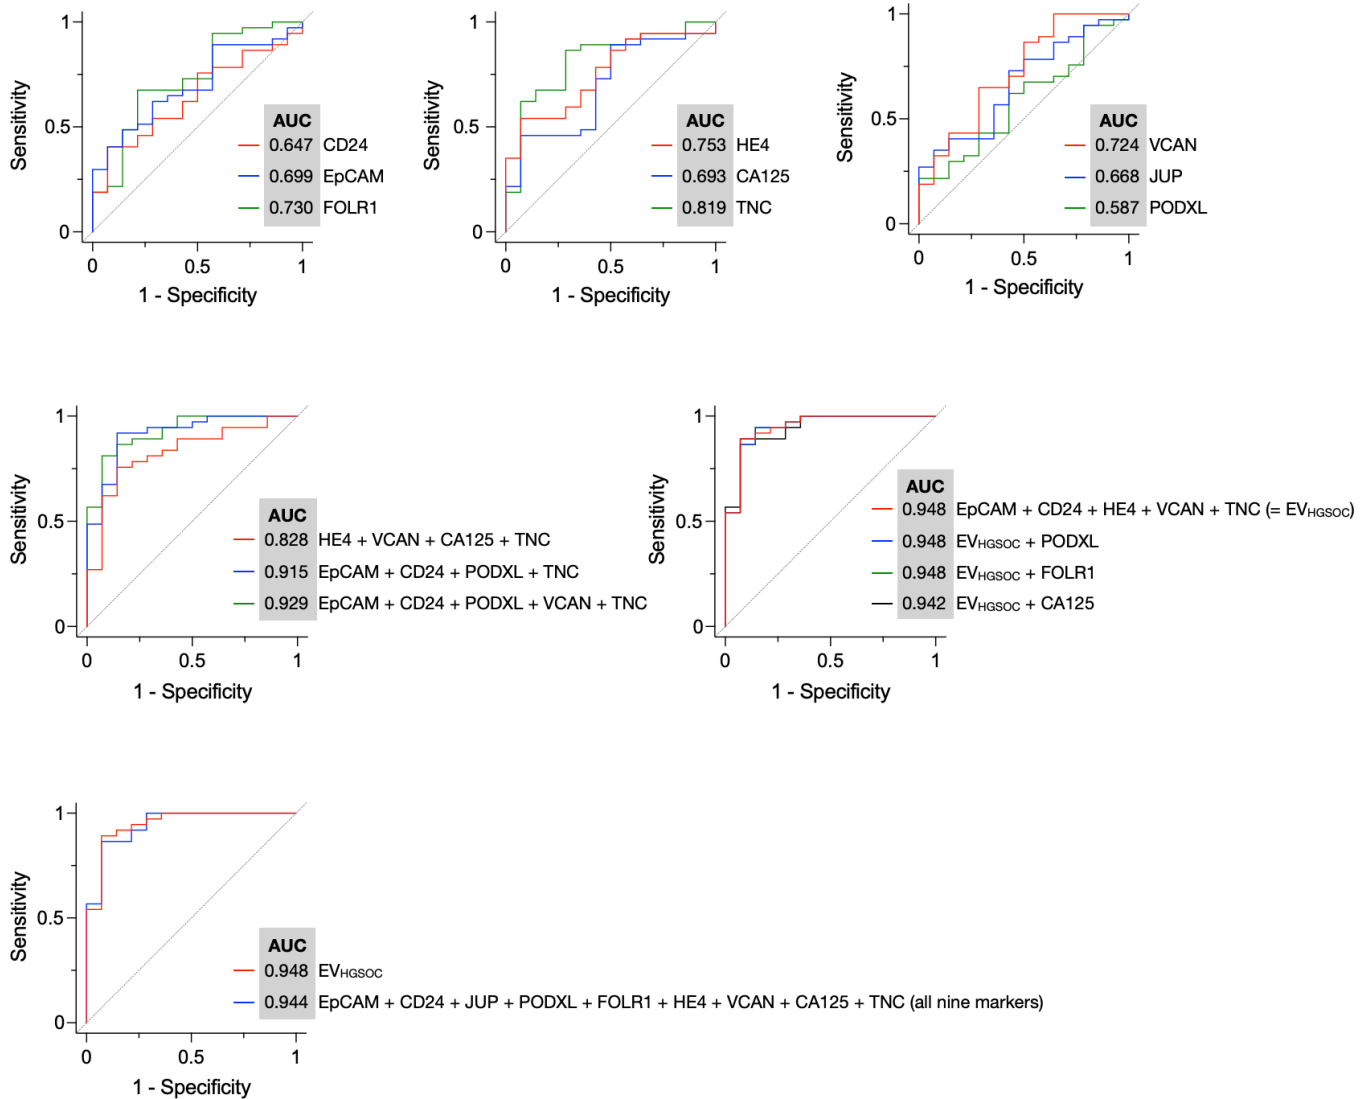

**Supplementary Figure S10. ROC analyses for HGSOC detection.** Single markers and their combinations were used as classifiers for control ( $n = 14$ ) vs. cancer ( $n = 37$ ) cases. EV<sub>HGSOC</sub> achieved the highest area under the curve (AUC) with a minimal marker set.

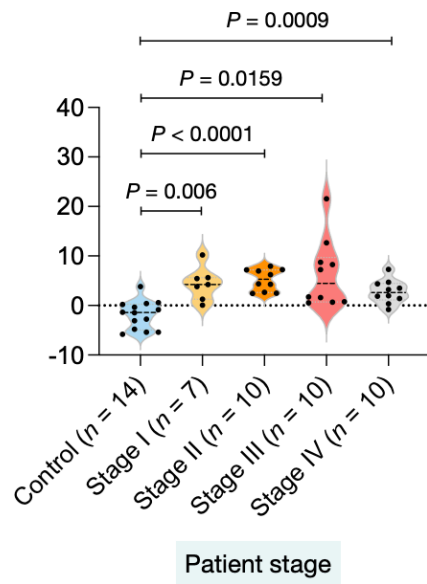

**Supplementary Figure S11. Stratified EV<sub>HGSOC</sub> scores per tumor stage.** Adjusted  $P$  values were obtained from Dunnett's T3 multiple comparisons test.

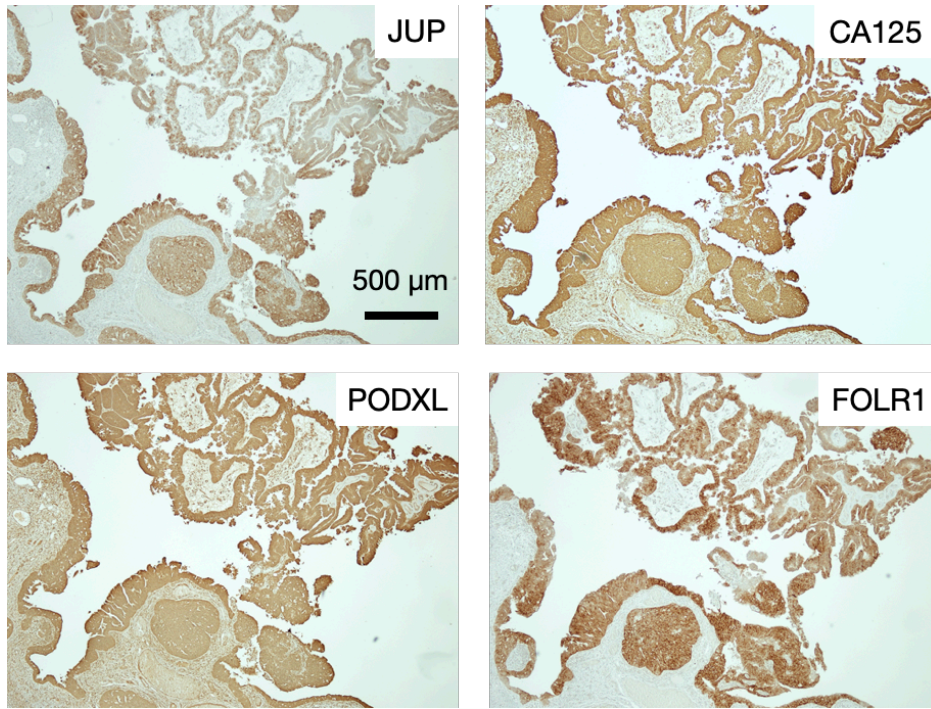

**Supplementary Figure S12. Images of IHC stained tissue from an HGSOE patient. STIC and HGSOE were stained positive for JUP, CA125, PODXL, and FOLR1.**

**Supplementary Table 1. Statistics of HGSOc diagnoses.**

| Markers                                                                  | Control vs. early stage |       |       |       | Control vs. all stage |       |         |       |
|--------------------------------------------------------------------------|-------------------------|-------|-------|-------|-----------------------|-------|---------|-------|
|                                                                          | AUC                     | Sen   | Spe   | Acc   | AUC                   | Sen   | Spe     | Acc   |
| CD24                                                                     | 0.782                   | 0.965 | 0.714 | 0.742 | 0.647                 | 0.405 | 0.857   | 0.549 |
| EpCAM                                                                    | 0.672                   | 0.941 | 0.429 | 0.710 | 0.699                 | 0.487 | 0.857   | 0.588 |
| FOLR1                                                                    | 0.714                   | 0.647 | 0.786 | 0.710 | 0.730                 | 0.676 | 0.786   | 0.706 |
| HE4                                                                      | 0.693                   | 0.941 | 0.429 | 0.710 | 0.753                 | 0.541 | 0.929   | 0.647 |
| CA125                                                                    | 0.626                   | 0.882 | 0.500 | 0.710 | 0.693                 | 0.892 | 0.500   | 0.765 |
| TNC                                                                      | 0.882                   | 1.000 | 0.643 | 0.839 | 0.819                 | 0.865 | 0.714   | 0.824 |
| VCAN                                                                     | 0.639                   | 1.000 | 0.357 | 0.710 | 0.724                 | 0.865 | 0.500   | 0.765 |
| JUP                                                                      | 0.576                   | 0.765 | 0.500 | 0.645 | 0.668                 | 0.730 | 0.571   | 0.686 |
| PODXL                                                                    | 0.542                   | 1.000 | 0.214 | 0.645 | 0.587                 | 0.216 | 100.000 | 0.431 |
| HE4 + VCAN + CA125 + TNC                                                 | 0.891                   | 0.765 | 0.929 | 0.839 | 0.828                 | 0.757 | 0.857   | 0.765 |
| EpCAM + CD24 + PODXL + TNC                                               | 0.971                   | 1.000 | 0.857 | 0.935 | 0.915                 | 0.919 | 0.857   | 0.882 |
| EpCAM + CD24 + PODXL + VCAN + TNC                                        | 0.979                   | 0.941 | 0.929 | 0.935 | 0.929                 | 0.811 | 0.929   | 0.824 |
| EpCAM + CD24 + HE4 + VCAN + TNC<br>(= EV <sub>HGSoc</sub> ) <sup>†</sup> | 0.966                   | 0.941 | 0.929 | 0.935 | 0.948                 | 0.892 | 0.929   | 0.902 |
| EpCAM + CD24 + HE4 + VCAN + TNC +<br>PODXL                               | 0.966                   | 0.941 | 0.929 | 0.935 | 0.948                 | 0.946 | 0.857   | 0.882 |
| EpCAM + CD24 + HE4 + VCAN + TNC +<br>FOLR1                               | 0.966                   | 0.941 | 0.929 | 0.935 | 0.948                 | 0.946 | 0.857   | 0.902 |
| EpCAM + CD24 + HE4 + VCAN + TNC +<br>CA125                               | 0.966                   | 0.941 | 0.929 | 0.935 | 0.942                 | 0.892 | 0.929   | 0.863 |
| EpCAM + CD24 + JUP + PODXL + FOLR1<br>+ HE4 + VCAN + CA125 + TNC         | 0.966                   | 0.941 | 0.929 | 0.935 | 0.944                 | 0.865 | 0.929   | 0.902 |

<sup>†</sup> The minimal marker set was selected for the highest diagnostic accuracy. AUC, area under the curve; Sen, sensitivity; Spe, specificity; Acc, accuracy.



**Supplementary Table 2. Performance summary of linear discriminant analysis (LDA).**

| Markers                                               | Correctly predicted cases |                   |                  |                     |                            |
|-------------------------------------------------------|---------------------------|-------------------|------------------|---------------------|----------------------------|
|                                                       | Non-cancer<br>(n = 14)    | Early<br>(n = 17) | Late<br>(n = 20) | Overall<br>accuracy | 95% confidence<br>interval |
| CD24                                                  | 2                         | 9                 | 10               | 0.412               | (0.255, 0.628)             |
| EpCAM                                                 | 6                         | 0                 | 15               | 0.412               | (0.314, 0.608)             |
| FOLR1                                                 | 6                         | 0                 | 15               | 0.412               | (0.294, 0.588)             |
| HE4                                                   | 8                         | 6                 | 13               | 0.529               | (0.353, 0.647)             |
| CA125                                                 | 7                         | 4                 | 17               | 0.549               | (0.353, 0.686)             |
| TNC                                                   | 9                         | 7                 | 8                | 0.471               | (0.353, 0.647)             |
| VCAN                                                  | 7                         | 4                 | 15               | 0.510               | (0.353, 0.647)             |
| JUP                                                   | 5                         | 7                 | 13               | 0.490               | (0.333, 0.628)             |
| PODXL                                                 | 3                         | 6                 | 15               | 0.471               | (0.294, 0.607)             |
| HE4, VCAN, CA125, TNC                                 | 8                         | 11                | 13               | 0.627               | (0.529, 0.824)             |
| EpCAM, CD24, PODXL, TNC                               | 12                        | 9                 | 10               | 0.608               | (0.529, 0.843)             |
| EpCAM, CD24, PODXL, VCAN, TNC                         | 10                        | 13                | 13               | 0.706               | (0.588, 0.863)             |
| EpCAM, CD24, HE4, VCAN, TNC                           | 10                        | 13                | 15               | 0.745 <sup>†</sup>  | (0.628, 0.882)             |
| EpCAM, CD24, HE4, VCAN, TNC, PODXL                    | 10                        | 13                | 15               | 0.745               | (0.648, 0.902)             |
| EpCAM, CD24, HE4, VCAN, TNC, FOLR1                    | 10                        | 12                | 15               | 0.725               | (0.628, 0.902)             |
| EpCAM, CD24, HE4, VCAN, TNC CA125                     | 10                        | 12                | 14               | 0.706               | (0.647, 0.902)             |
| EpCAM, CD24, JUP, PODXL, FOLR1, HE4, VCAN, CA125, TNC | 10                        | 14                | 14               | 0.745               | (0.706, 0.922)             |

<sup>†</sup> The minimal marker set for LDA was selected for the highest accuracy in the three-group classification.

**Supplementary Table 3. Confusion matrix of the 5-marker LDA model.**

|                |             | Clinical diagnosis |             |            |
|----------------|-------------|--------------------|-------------|------------|
|                |             | Control            | Early HGSOC | Late HGSOC |
| LDA prediction | Control     | 10                 | 0           | 3          |
|                | Early HGSOC | 1                  | 13          | 2          |
|                | Late HGSOC  | 3                  | 4           | 15         |

**Supplementary Table 4. Primary antibodies used in the study.**

| Target         | Application | Dilution | Vendor      | Catalog #   |
|----------------|-------------|----------|-------------|-------------|
| CA125          | WB          | 1:1000   | Abbiotec    | 250556      |
| $\gamma$ -H2AX | WB          | 1:1000   | CST         | 9718S       |
| PAX8           | WB          | 1:1000   | ProteinTech | 10336-1-AP  |
| $\beta$ -actin | WB          | 1:2000   | Sigma       | A2228       |
| CA125          | IF          | 1:250    | Abbiotec    | 250556      |
| p53            | IF          | 1:100    | Leica       | CM5         |
| KI-67          | IF          | 1:100    | Novus       | NB110-89719 |
| WT-1           | IF          | 1:300    | Abcam       | ab15249     |
| PAX8           | Murine IHC  | 1:600    | ProteinTech | 10336-1-AP  |
| p53            | Murine IHC  | 1:200    | Abcam       | ab1431      |
| Stathim        | Murine IHC  | 1:2000   | CST         | 13655       |
| WT-1           | Murine IHC  | 1:100    | Sigma       | 348M-9      |
| CD24           | Murine IHC  | 1:50     | Bioss       | 4891R       |
| EpCAM          | Murine IHC  | 1:50     | Bioss       | 1513R       |
| FOLR1          | Murine IHC  | 1:50     | Abcam       | ab67422     |
| HE4            | Murine IHC  | 1:50     | LsBio       | LS-C409035  |
| JUP            | Murine IHC  | 1:50     | Genetex     | GTX114156   |
| CA125          | Murine IHC  | 1:50     | LsBio       | LS-C408274  |
| PODXL          | Murine IHC  | 1:50     | Bioss       | 1345R       |
| TNC            | Murine IHC  | 1:50     | LsBio       | LS-C413317  |
| VCAN           | Murine IHC  | 1:50     | Bioss       | 2533R       |
| CD24           | Human IHC   | 1:250    | Novus       | NBP1-46390  |
| EpCAM          | Human IHC   | 1:100    | Bioss       | 1513R       |
| FOLR1          | Human IHC   | 1:100    | Abcam       | ab67422     |
| HE4            | Human IHC   | 1:100    | LsBio       | LS-C409035  |
| JUP            | Human IHC   | 1:100    | Genetex     | GTX114156   |
| CA125          | Human IHC   | 1:100    | LsBio       | LS-C408274  |
| PODXL          | Human IHC   | 1:100    | Bioss       | 1345R       |
| TNC            | Human IHC   | 1:100    | LsBio       | LS-C413317  |
| VCAN           | Human IHC   | 1:100    | Novus       | NBP1-85432  |

WB, western blotting; IF, immunofluorescence; IHC, immunohistochemistry.

**Supplementary Table 5. Antibodies used for EV ELISA.**

| Target      | Species     | Dilution      | Vendor          | Catalog #  | Isotype               |
|-------------|-------------|---------------|-----------------|------------|-----------------------|
| CD24        | Mouse       | 1:100         | Biolegend       | 101801     | Rat IgG2b             |
| CD24        | Human       | 1:250         | Biolegend       | 311102     | Mouse IgG2a           |
| EpCAM       | Mouse/Human | 1:250, 1:40   | Invitrogen      | MA5-12436  | Mouse IgG1            |
| FOLR1       | Mouse/Human | 1:500, 1:200  | LsBio           | LS-C119975 | Rabbit IgG polyclonal |
| HE4         | Mouse/Human | 1:750, 1:300  | LsBio           | LS-C409035 | Rabbit IgG polyclonal |
| JUP         | Mouse/Human | 1:250, 1:100  | LsBio           | LS-B2204   | Goat IgG polyclonal   |
| CA125       | Mouse/Human | 1:1000, 1:400 | LsBio           | LS-C408274 | Rabbit IgG polyclonal |
| PODXL       | Mouse       | 1:200         | R&D systems     | MAB1556    | Rat IgG2b             |
| PODXL       | Human       | 1:500         | R&D systems     | AF1658     | Goat IgG polyclonal   |
| TNC         | Mouse/Human | 1:500, 1:200  | LsBio           | LS-C413317 | Rabbit IgG polyclonal |
| VCAN        | Mouse       | 1:400         | Bioss           | BS-2533R   | Rabbit IgG polyclonal |
| VCAN        | Human       | 1:200         | Millipore Sigma | HPA004726  | Rabbit IgG polyclonal |
| CD9         | Mouse       | 1:100         | Biolegend       | 124802     | Rat IgG2a             |
| CD9         | Human       | 1:250         | BD Biosciences  | 555370     | Mouse IgG1            |
| CD63        | Mouse       | 1:200         | Biolegend       | 143902     | Rat IgG2a             |
| CD63        | Human       | 1:500         | Ancell          | 215-820    | Mouse IgG1            |
| CD81        | Mouse       | 1:200         | Biolegend       | 104901     | Armenian Hamster IgG1 |
| TSG101      | Mouse       | 1:200         | Genetex         | 118736     | Rabbit IgG polyclonal |
| Histone 2B  | Mouse       | 1:200         | Biolegend       | 606302     | Rat IgG2a             |
| CD63-biotin | Mouse       | 1:200         | Biolegend       | 143918     | -                     |

| IgG isotype           | Species     | Dilution | Vendor            | Catalog #   |
|-----------------------|-------------|----------|-------------------|-------------|
| Rat IgG2a             | Mouse/Human | <i>a</i> | Biolegend         | 400502      |
| Rat IgG2b             | Mouse/Human | <i>a</i> | Biolegend         | 400602      |
| Mouse IgG1            | Mouse/Human | <i>a</i> | Biolegend         | 400102      |
| Mouse IgG2a           | Mouse/Human | <i>a</i> | Biolegend         | 400202      |
| Rabbit polyclonal IgG | Mouse/Human | <i>a</i> | Biolegend         | 910801      |
| Goat IgG Isotype      | Mouse/Human | <i>a</i> | Novus Biologicals | NB410-28088 |
| Armenian Hamster IgG  | Mouse/Human | <i>a</i> | Biolegend         | 400902      |

*a.* IgG isotype controls were diluted to the same concentration of primary antibody for each biomarker

| Biotinylated secondary                 | Species     | Dilution | Vendor          | Catalog # |
|----------------------------------------|-------------|----------|-----------------|-----------|
| Goat Anti-Rat IgG, Biotin-SP           | Mouse/Human | 1:750    | Millipore Sigma | AP183B    |
| Goat Anti-Rabbit IgG, Biotin-SP        | Mouse/Human | 1:500    | Millipore Sigma | AP132B    |
| Goat Anti-Mouse IgG, Biotin-SP         | Mouse/Human | 1:500    | Millipore Sigma | AP124B    |
| Goat Anti-Armenian hamster IgG, Biotin | Mouse/Human | 1:250    | Biolegend       | 405501    |
| Rabbit Anti-Goat IgG, Biotin           | Mouse/Human | 1:750    | ThermoFisher    | A16146    |

**Supplementary Table 6. Antibodies used for single EV imaging.**

| <b>Primary antibody</b>   | <b>Dilution</b> | <b>Vendor</b> | <b>Catalog #</b> | <b>Isotype</b>        |
|---------------------------|-----------------|---------------|------------------|-----------------------|
| CD9                       | 1:50            | Biologend     | 124802           | Rat IgG2a             |
| CD63                      | 1:50            | Biologend     | 143902           | Rat IgG2a             |
| PAX8                      | 1:50            | ProteinTech   | 60145-4-Ig       | Mouse IgG             |
| CA125                     | 1:100           | LsBio         | LS-C408274       | Rabbit IgG polyclonal |
| VCAN                      | 1:100           | Bioss         | BS-2533R         | Rabbit IgG polyclonal |
| TNC                       | 1:100           | LsBio         | LS-C413317       | Rabbit IgG polyclonal |
| FOLR1                     | 1:100           | LsBio         | LS-C119975       | Rabbit IgG polyclonal |
| HE4                       | 1:100           | LsBio         | LS-C409035       | Rabbit IgG polyclonal |
| <b>Secondary antibody</b> |                 |               |                  |                       |
| Anti-Rat AlexaFluor647    | 1:400           | Abcam         | ab150155         | -                     |
| Anti-Mouse AlexaFluor488  | 1:400           | Abcam         | ab150105         | -                     |
| Anti-Rabbit AlexaFluor594 | 1:400           | Abcam         | ab150076         | -                     |
